# Supplementary material for: Structural Identification of Antibacterial Lipids from Amazonian Palm Tree Endophytes through the Molecular Network Approach
Source: Int J Mol Sci. 2019 Apr 24;20(8):2006. doi: 10.3390/ijms20082006 (PMC6514718; doi:10.3390/ijms20082006)
Supplement: Supplementary file 1 [file ijms-20-02006-s001.pdf]

SUPPORTING INFORMATION FOR :

# Structural identification of antibacterial lipids from Amazonian palm tree endophytes through the Molecular Network approach

Morgane Barthélemy <sup>1</sup>, Nicolas Elie <sup>1</sup>, Léonie Pellissier <sup>2</sup>, Jean-Luc Wolfender <sup>2</sup>, Didier Stien <sup>3</sup>, David Touboul <sup>1</sup> and Véronique Eparvier <sup>1,\*</sup>

<sup>1</sup> CNRS-Institut de Chimie des Substances Naturelles, UPR2301, Université Paris-Saclay, 91198 Gif-sur-Yvette cedex, France; morgane.barthelemy@cnrs.fr, nicolas.elie@cnrs.fr

<sup>2</sup> School of Pharmaceutical Sciences, EPGL, University of Geneva, University of Lausanne, Rue Michel Servet 1, CH-1211, Geneva, Switzerland; leonie.pellissier@unige.ch, jean-luc.wolfender@unige.ch

<sup>3</sup> Sorbonne Universités, UPMC Univ. Paris 06, CNRS, Laboratoire de Biodiversité et Biotechnologies Microbiennes (LBBM), Observatoire Océanologique, 66650 Banyuls-sur-Mer, France; didier.stien@cnrs.fr

\* Correspondence: veronique.eparvier@cnrs.fr; Tel.: +33-(0)16-982-3679, david.touboul@cnrs.fr; Tel: +33-(0)16-982-3032

## Table of content

|                                                                                                                                                                                                                                                                                       |          |
|---------------------------------------------------------------------------------------------------------------------------------------------------------------------------------------------------------------------------------------------------------------------------------------|----------|
| Molecular network of the 131 extracts from fungal endophytes                                                                                                                                                                                                                          | S1       |
| Dereplication process and MS <sup>2</sup> fragmentation spectra of nodes belonging to the clusters composed by ions from the four active fungal extracts.                                                                                                                             | S2       |
| Molecular network of the 66 extracts from bacterial endophytes                                                                                                                                                                                                                        | S3       |
| Dereplication process of nodes belonging to the clusters composed by ions from the <i>Luteibacter</i> sp. extract.                                                                                                                                                                    | S4       |
| Dereplication process of nodes belonging to the clusters composed by ions from the <i>Bacillus</i> sp. extract                                                                                                                                                                        | S5       |
| NMR spectra and HRMS of ( <i>R</i> )-2-hydroxy-13-methyltetradecanoic acid (1)                                                                                                                                                                                                        | S6-S8    |
| NMR spectra and HRMS of ( <i>R</i> )-3-hydroxy-14-methyl-pentadecanoic acid (2)                                                                                                                                                                                                       | S9-S11   |
| NMR spectra and HRMS of ( <i>S</i> )-β-hydroxypalmitic acid (3)                                                                                                                                                                                                                       | S12-S14  |
| NMR spectra and HRMS of ( <i>R</i> )-3-hydroxy-15-methylhexadecanoic acid (4)                                                                                                                                                                                                         | S15-17   |
| NMR spectra and HRMS of ( <i>R</i> )-3-hydroxy-13-methyltetradecanoic acid (5)                                                                                                                                                                                                        | S18-20   |
| NMR spectra and HRMS of 13-methyltetradecanoic acid (6)                                                                                                                                                                                                                               | S21-23   |
| NMR spectra and HRMS of 9 <i>Z</i> -hexadecenoic acid (7)                                                                                                                                                                                                                             | S24-26   |
| NMR spectra and HRMS of 15-methyl-9 <i>Z</i> - hexadecenoic acid compound (8)                                                                                                                                                                                                         | S27-29   |
| Fragmentation of 9 <i>Z</i> -hexadecenoic acid (7)                                                                                                                                                                                                                                    | S30      |
| Fragmentation of 15-methyl-9 <i>Z</i> -hexadecenoic acid (8)                                                                                                                                                                                                                          | S31      |
| Identification of endophytic microorganisms associated with <i>Astrocaryum sciophilum</i> and biological activities of their respective EtOAc extracts: antibacterial on methicillin-resistant <i>S. aureus</i> (MIC in µg/ml) and cytotoxicity on MRC-5 cells (viability percentage) | Table S1 |
| Antibacterial activity of AcOEt extract of <i>Luteibacter</i> sp. and its fractions on MRSA (Minimum Inhibitory Concentration in µg/ml)                                                                                                                                               | Table S2 |

**Figure S1.** Molecular network of the 131 extracts from fungal endophytes. Relative quantification of each ion within the extracts are represented as a XIC area-dependent pie-chart drawing.

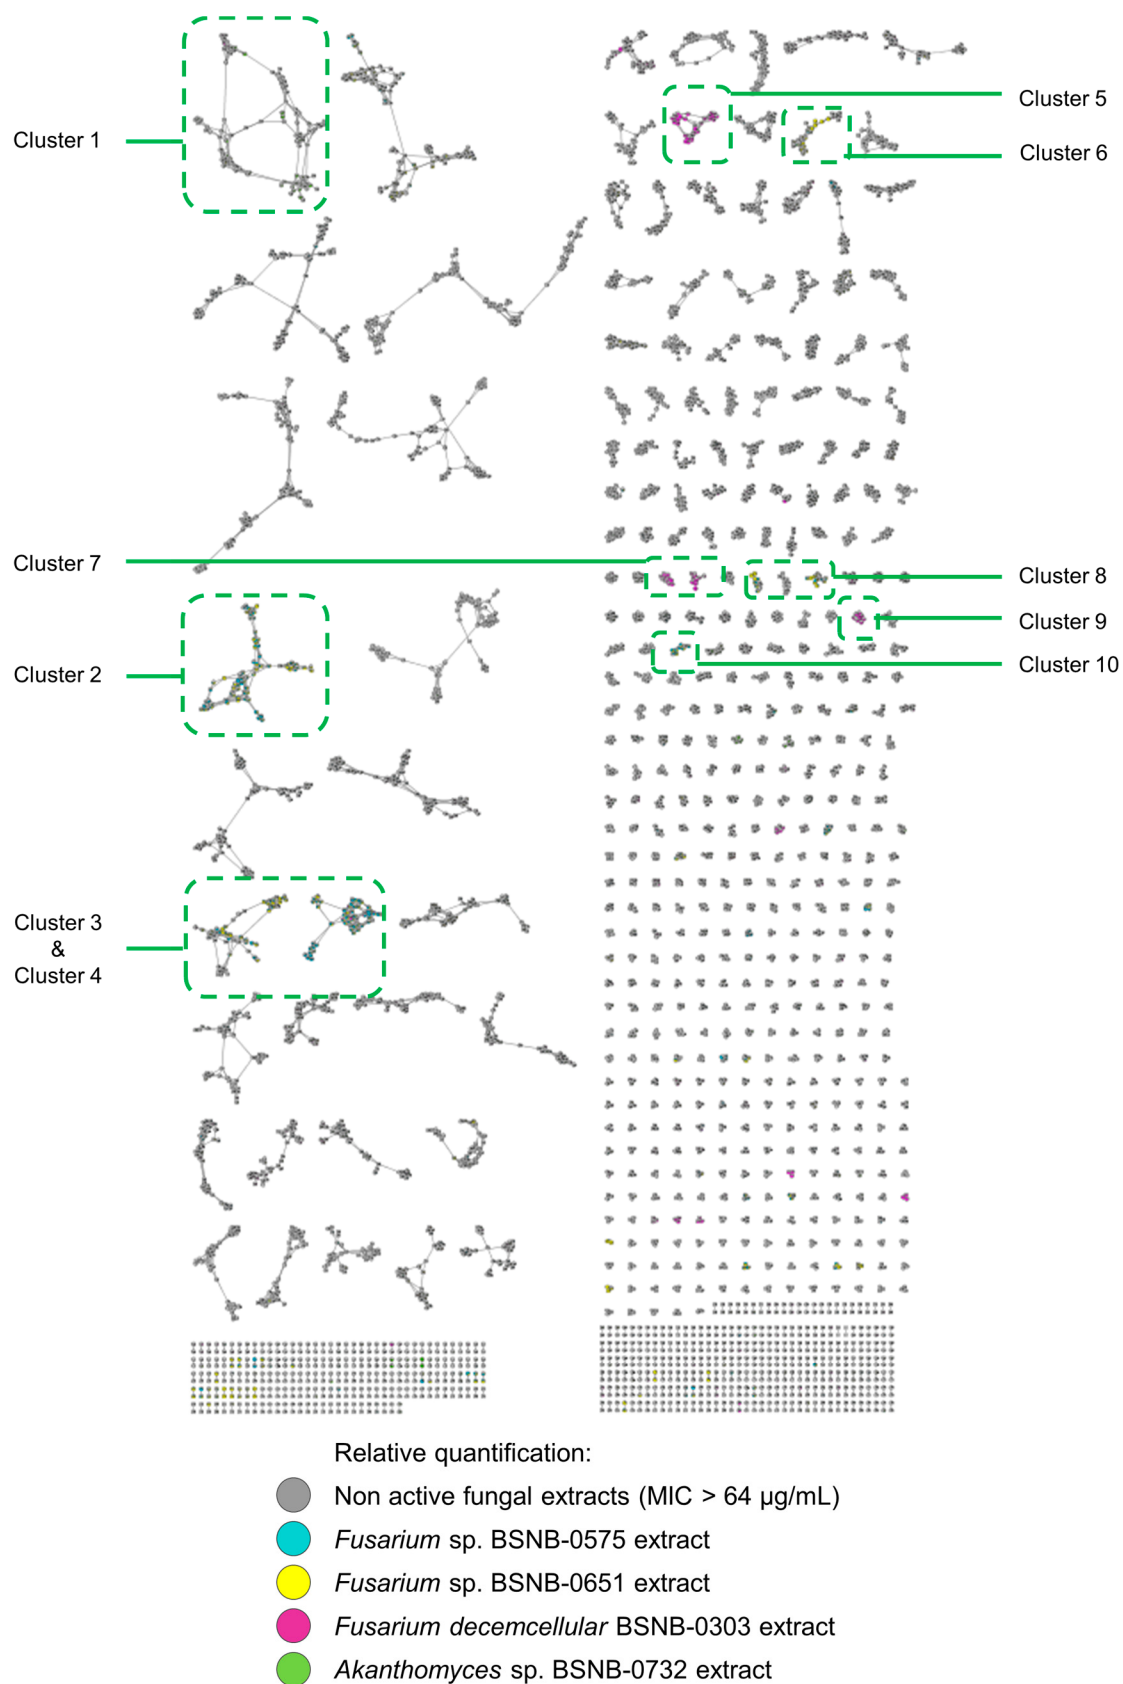

**Figure S2.** Dereplication process and MS/MS fragmentation spectra of nodes belonging to the clusters composed by ions from the four active fungal extracts

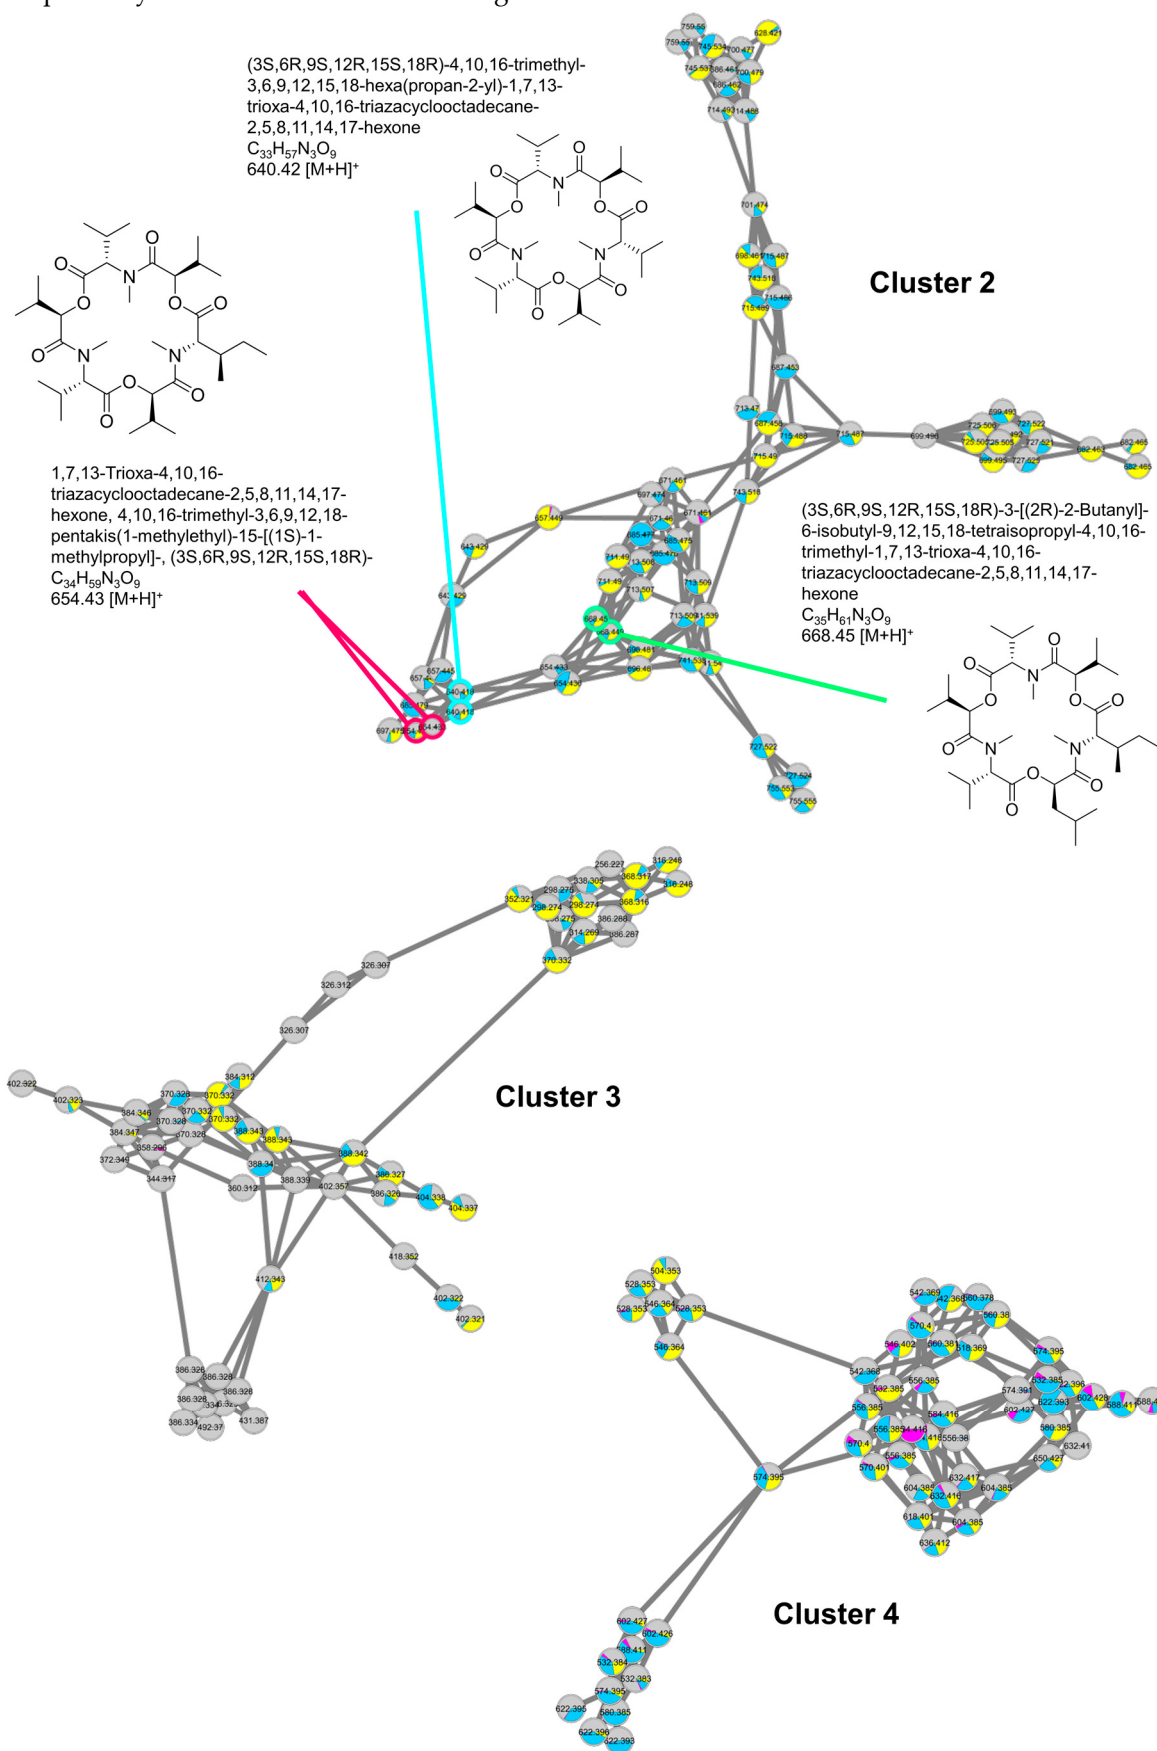

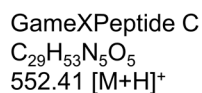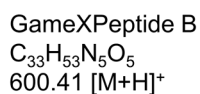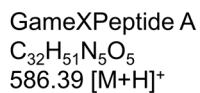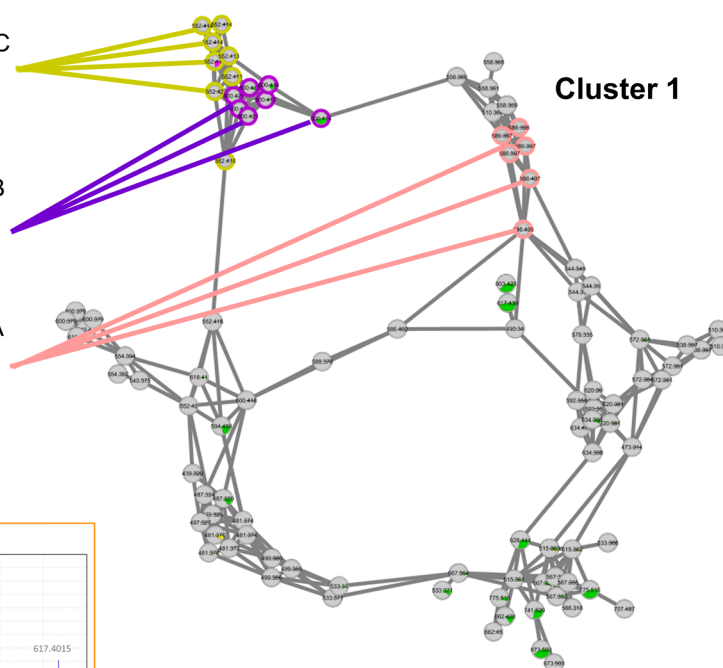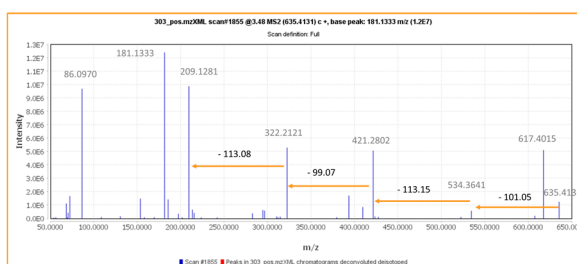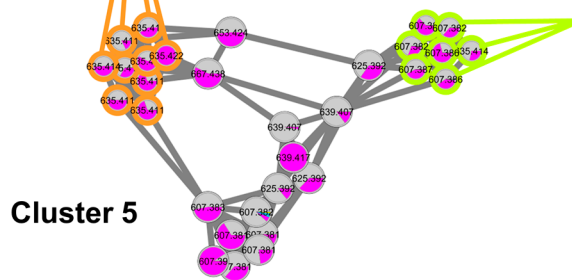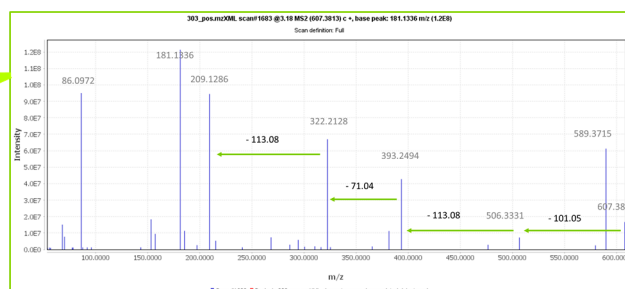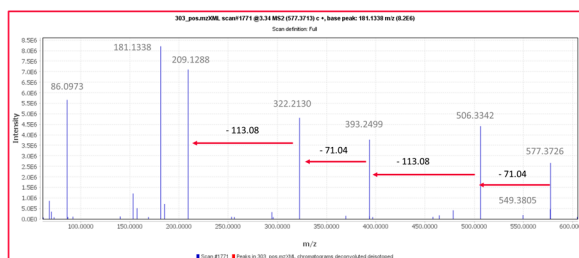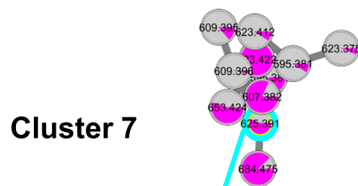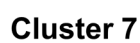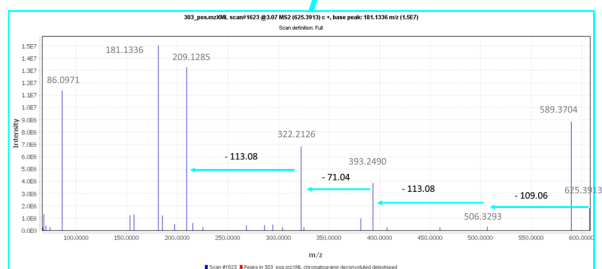

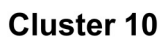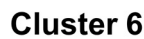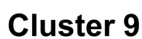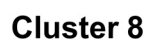

**Figure S3.** Molecular network of the 66 extracts from bacterial endophytes. Relative quantification of each ion within the extracts are represented as a XIC area-dependent pie chart drawing.

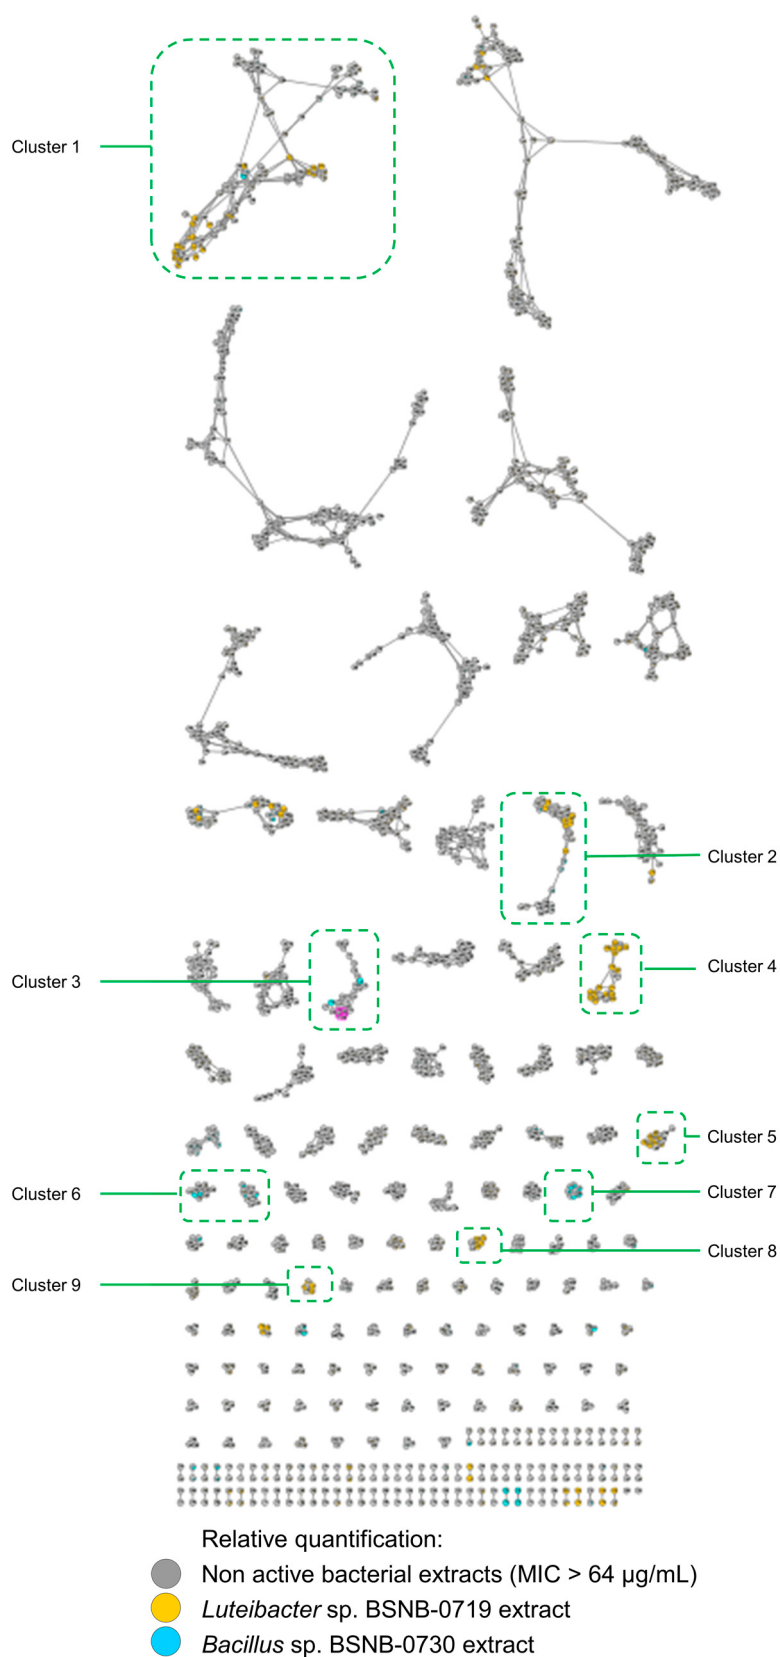

**Figure S4.** Dereplication process of nodes belonging to the clusters composed by ions from the *Luteibacter* sp. extract.

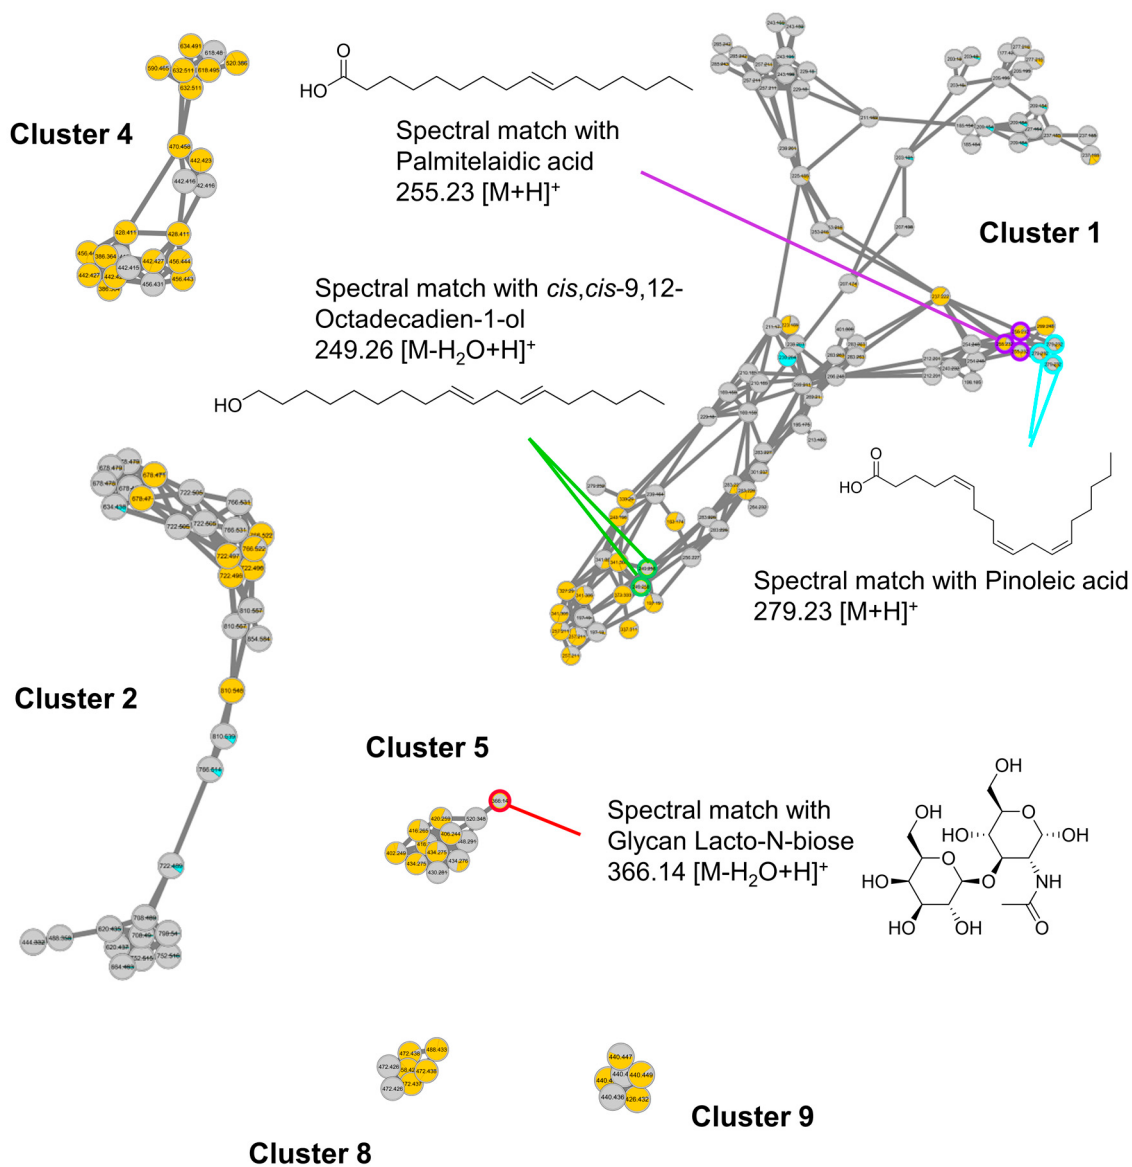

**Figure S5.** Dereplication process of nodes belonging to the clusters composed by ions from the *Bacillus* sp. extract (left). Relative quantification of those clusters depending on the bacterial genus (right).

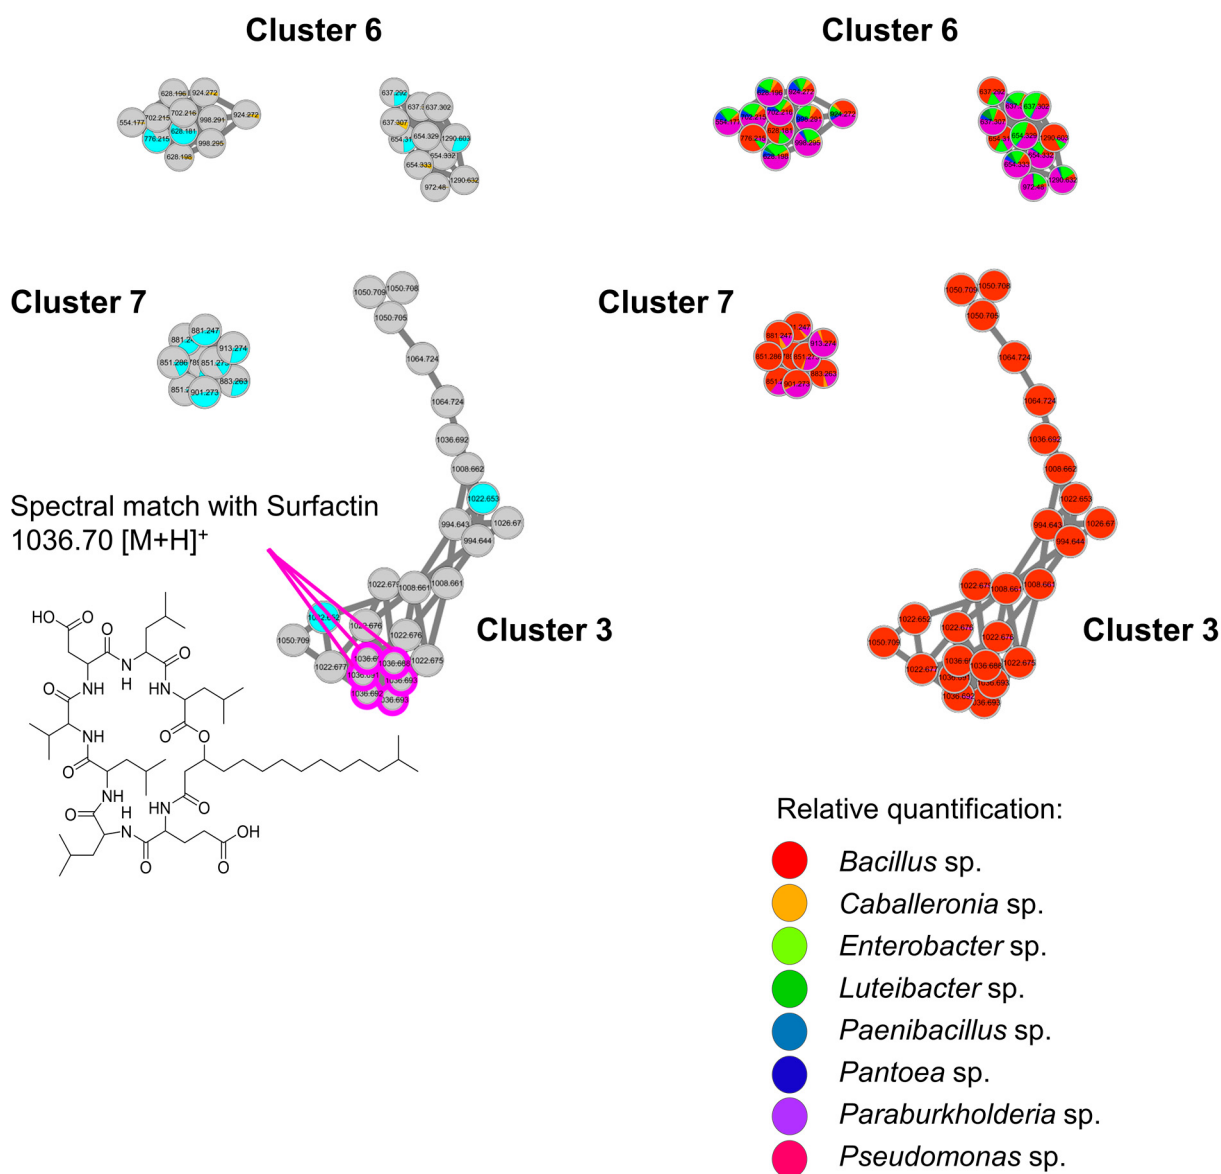

Chemical structure of 10-hydroxy-10-methylundecanoic acid is shown in the top left corner. The  $^1\text{H}$  NMR spectrum is recorded in  $\text{CD}_3\text{OD}$ . The x-axis represents the chemical shift in ppm, ranging from 0 to 10. The y-axis represents the intensity. Key peaks are labeled:  $\text{H}_2\text{O}$  at approximately 4.7 ppm and  $\text{CD}_3\text{OD}$  at approximately 3.3 ppm. Integration values are provided below the baseline for several peak regions: 1.0 (for the methine proton at ~4.1 ppm), 1.1, 1.1, 1.0, 2.3, 15.9, 2.1, and 6.3 (for the alkyl chain region between 0.8 and 2.0 ppm). A list of chemical shifts (ppm) is provided in the top right corner: 1.75, 1.63, 1.55, 1.44, 1.30, 1.17, and 0.88.

$^{13}\text{C}$  NMR spectrum of compound **1** in  $\text{CD}_3\text{OD}$ . The spectrum shows a broad range of chemical shifts from 0 to 180 ppm. Key peaks are labeled: 178.6 ppm (amide carbonyl), 71.9 ppm (methoxy singlet), and a cluster of peaks between 20-40 ppm corresponding to the sugar moiety. The solvent peak for  $\text{CD}_3\text{OD}$  is visible at approximately 49.9 ppm.

05-Sep-2017 15:12:30  
EPARVIER\_barthel47-1 22 (0.598) Cm (17:29)

LCT Premier XE KE483  
2: TOF MS ES-  
1.36e5

Mass spectrum showing relative intensity (%) versus m/z. The base peak is at m/z 515.4294. Other significant peaks are labeled at m/z 91.0027, 257.2109, 303.2164, 304.2193, 393.1871, 516.4334, 537.4112, 538.4163, 605.4044, 673.3888, 811.6002, 817.6165, 818.6220, 885.6026, 935.7208, 1097.8208, 1175.7612, and 1378.0244.

**Figure S9.**  $^1\text{H}$  NMR spectrum of (*R*)-3-hydroxy-14-methyl-pentadecanoic acid (**2**)

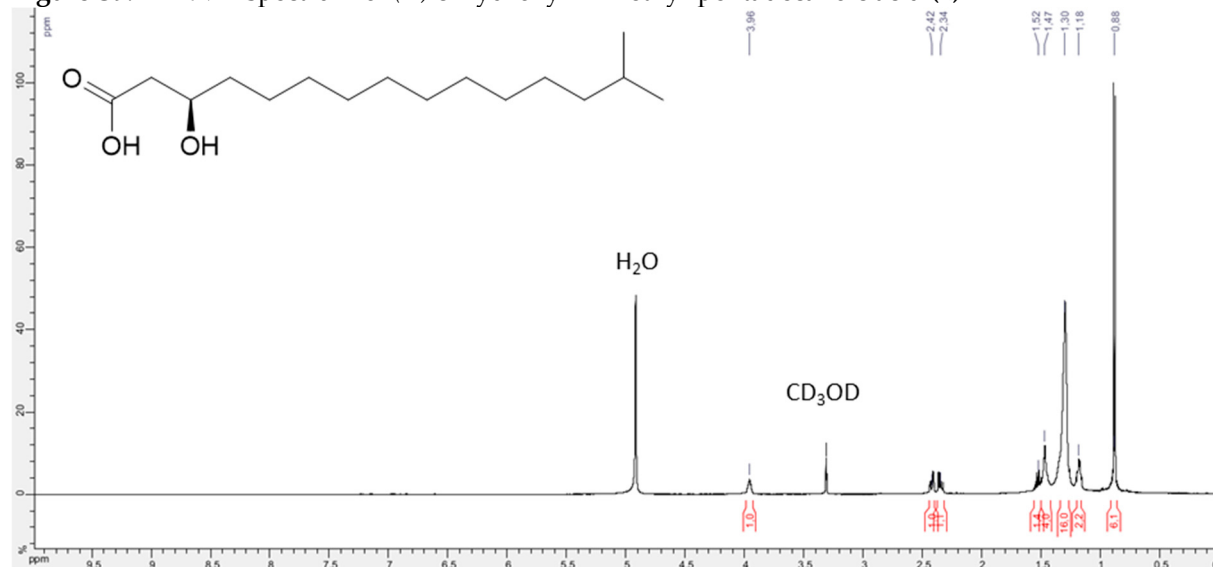

**Figure S10.**  $^{13}\text{C}$  NMR spectrum of (*R*)-3-hydroxy-14-methyl-pentadecanoic acid (**2**)

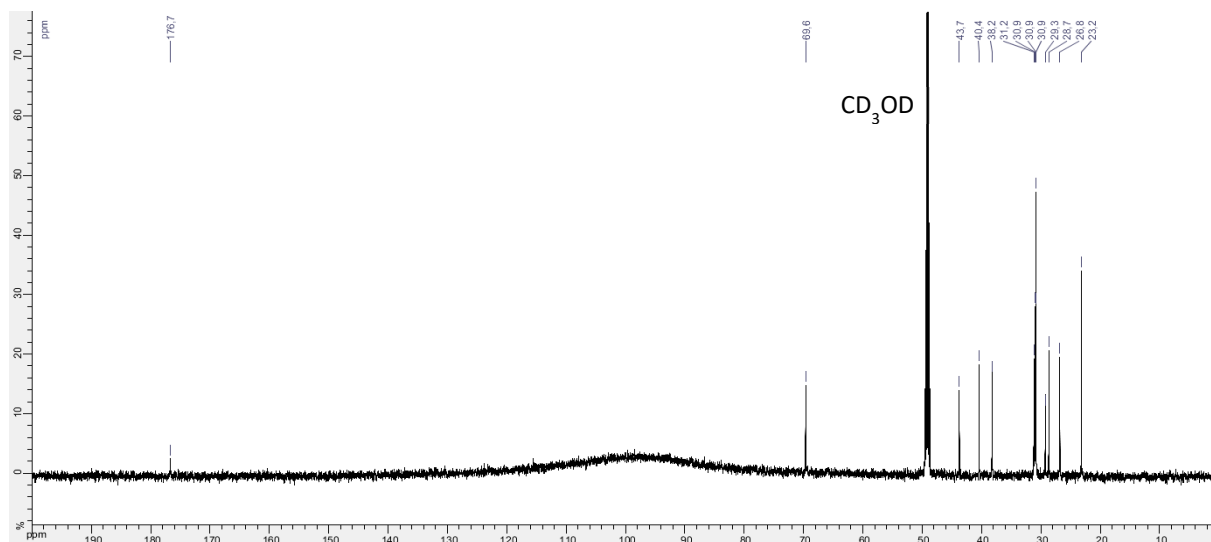

**Figure S11.** MS spectrum of (*R*)-3-hydroxy-14-methyl-pentadecanoic acid (**2**)

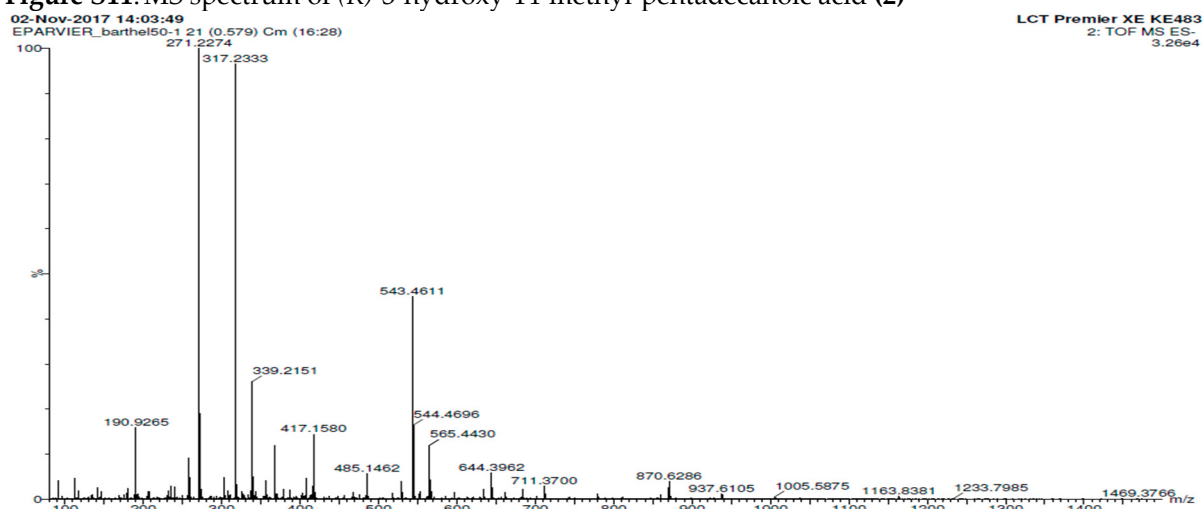

**Figure S12.**  $^1\text{H}$  NMR spectrum of (*S*)- $\beta$ -hydroxypalmitic acid (**3**)

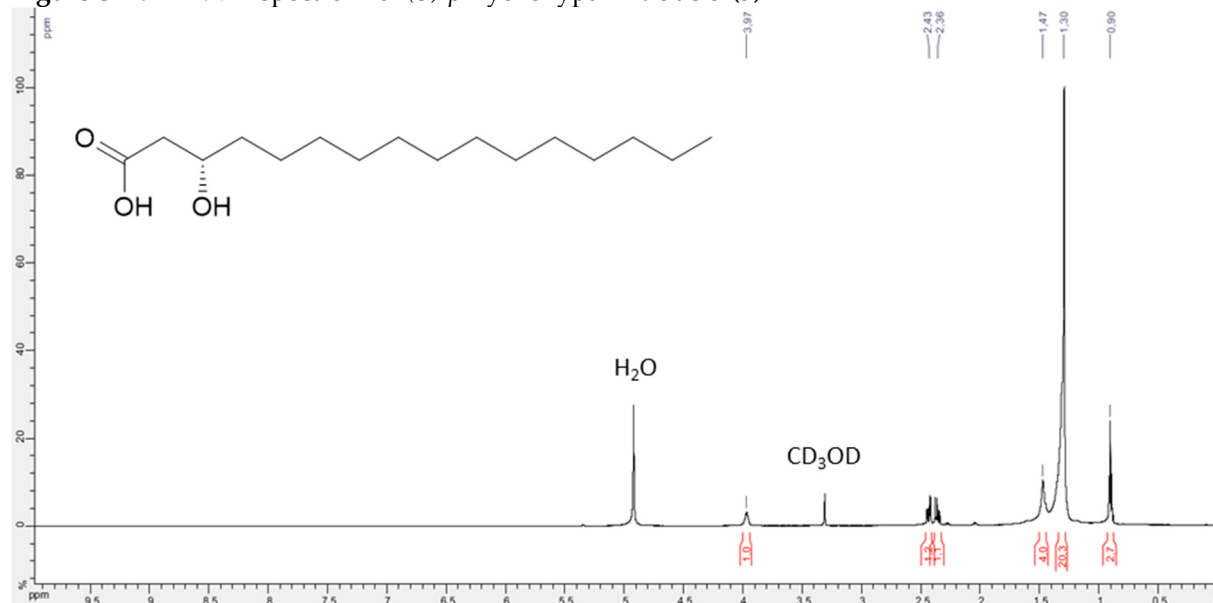

**Figure S13.**  $^{13}\text{C}$  NMR spectrum of (*S*)- $\beta$ -hydroxypalmitic acid (**3**)

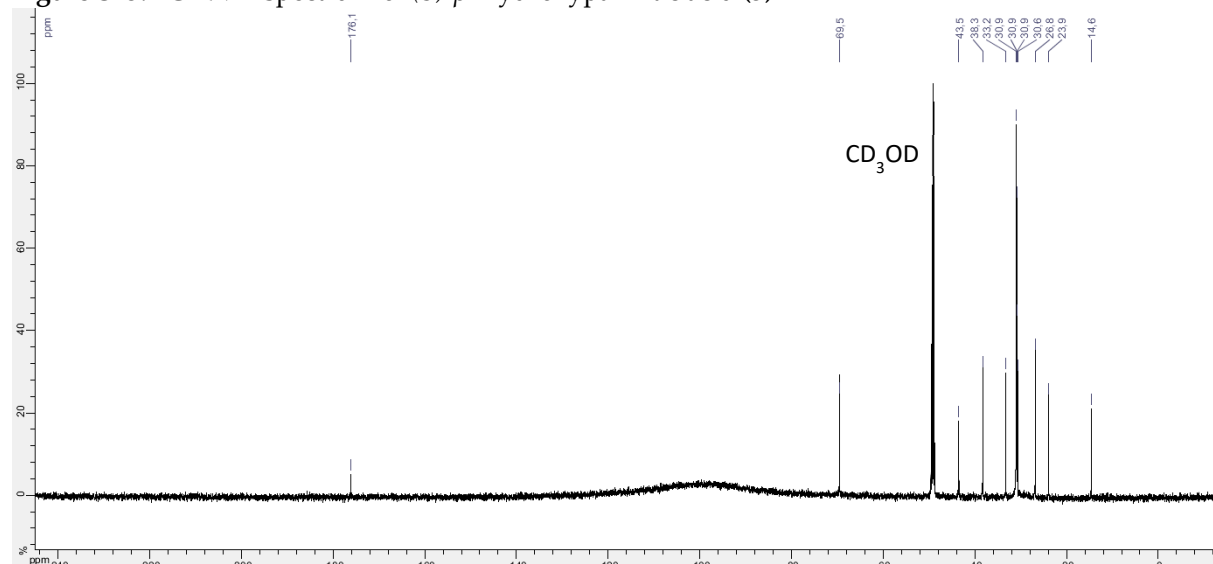

**Figure S14.** MS spectrum of (*S*)- $\beta$ -hydroxypalmitic acid (**3**)

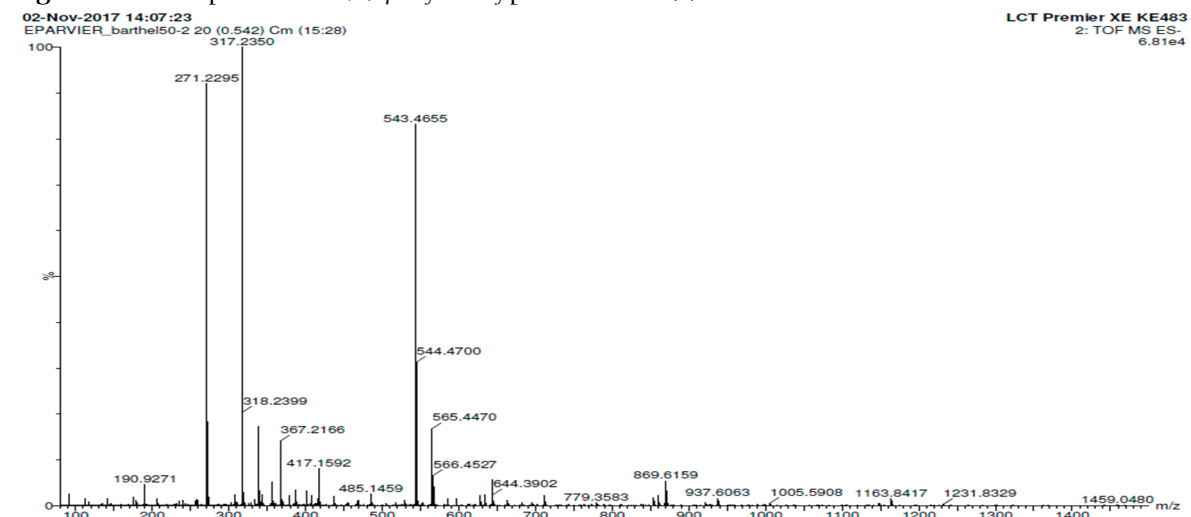

**Figure S15.**  $^1\text{H}$  NMR spectrum of (*R*)-3-hydroxy-15-methylhexadecanoic acid (**4**) in  $\text{CD}_3\text{OD}$

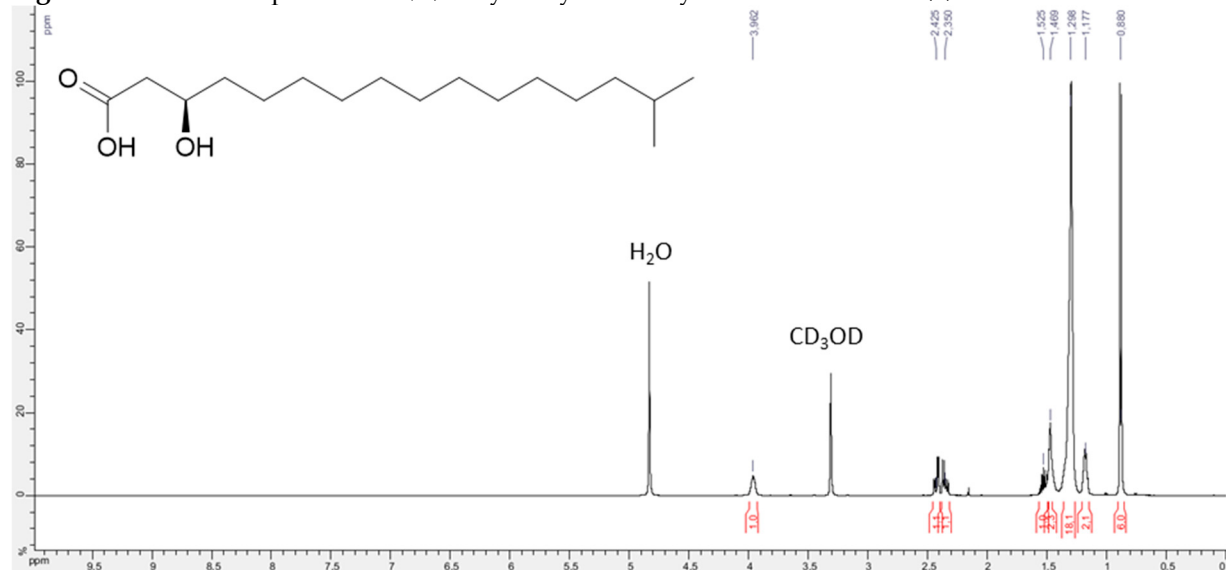

**Figure S16.**  $^{13}\text{C}$  NMR spectrum of (*R*)-3-hydroxy-15-methylhexadecanoic acid (**4**) in  $\text{CD}_3\text{OD}$

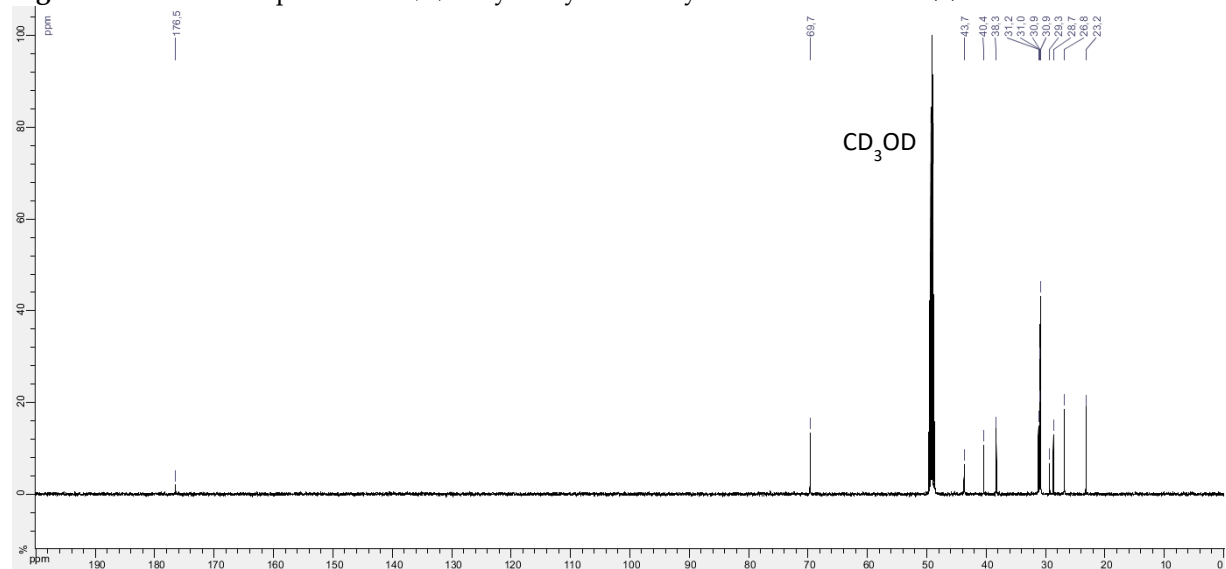

**Figure S17.** MS spectrum of (*R*)-3-hydroxy-15-methylhexadecanoic acid (**4**)

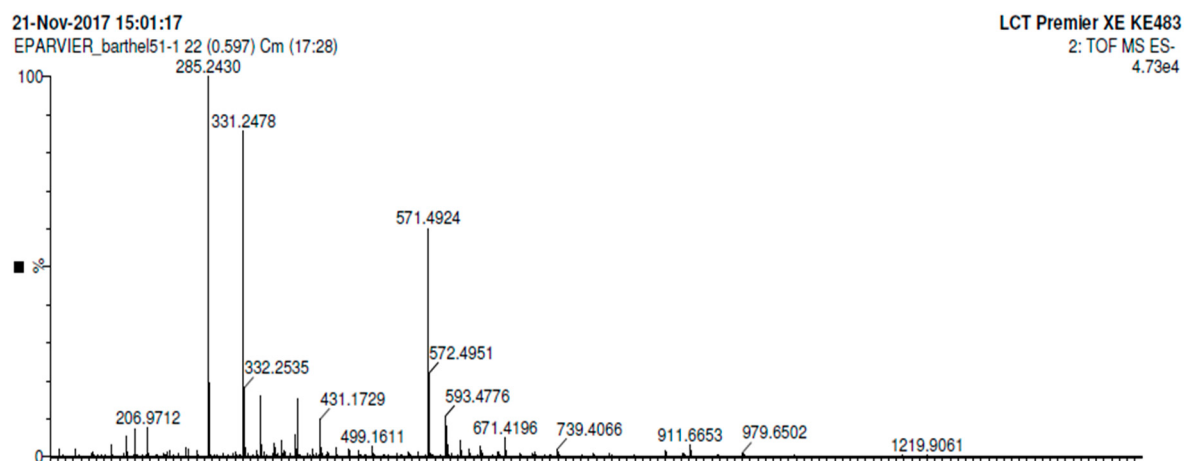

**Figure S18.**  $^1\text{H}$  NMR spectrum of (*R*)-3-hydroxy-13-methyltetradecanoic acid (**5**) in  $\text{CD}_3\text{OD}$

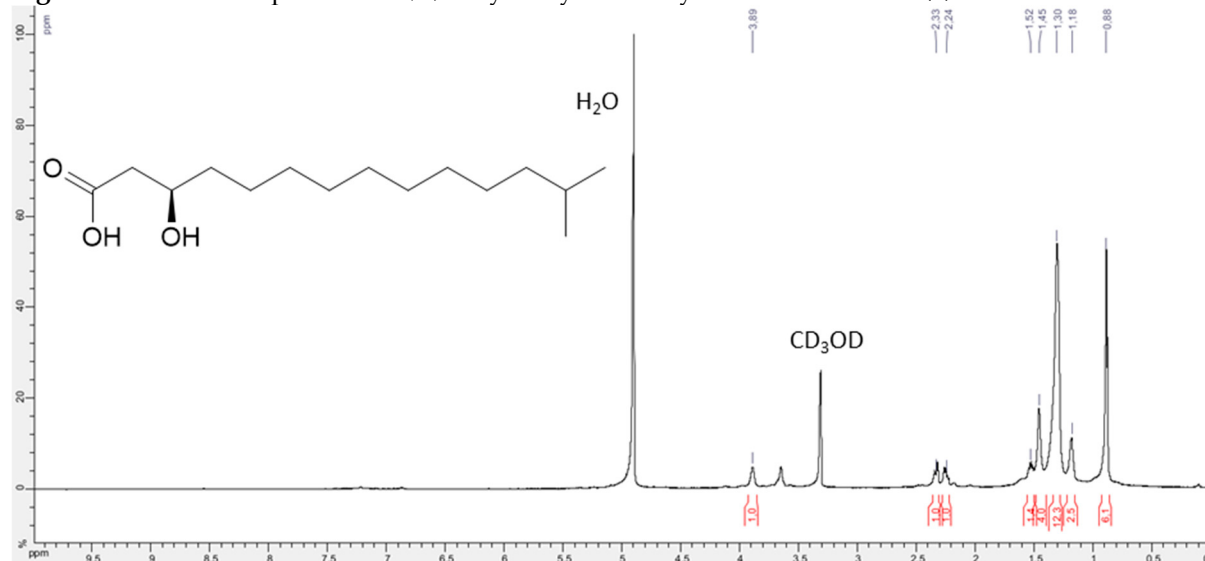

**Figure S19.**  $^{13}\text{C}$  NMR spectrum of (*R*)-3-hydroxy-13-methyltetradecanoic acid (**5**) in  $\text{CD}_3\text{OD}$

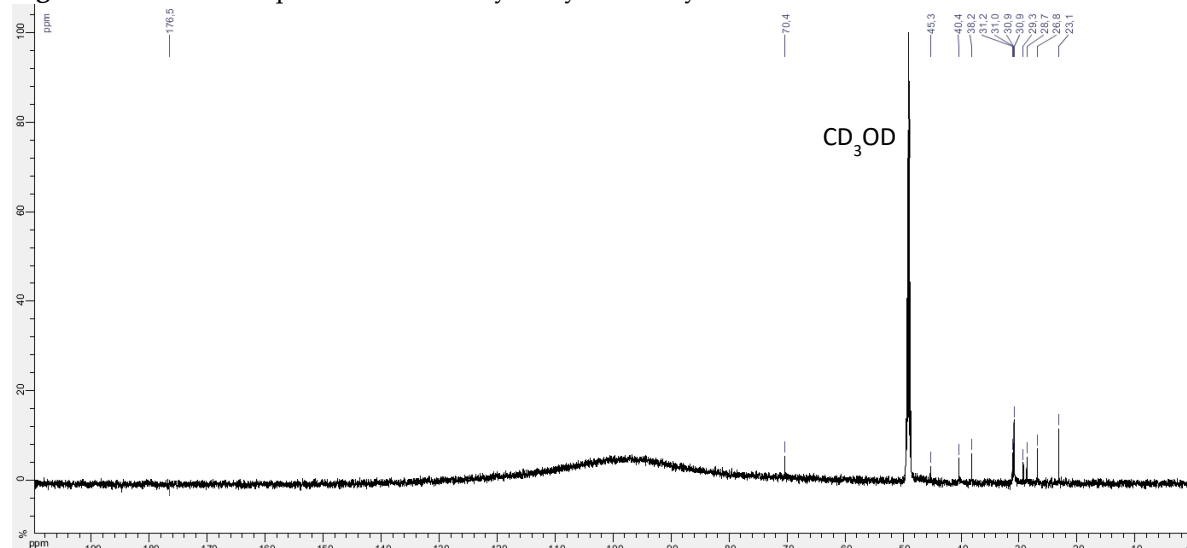

**Figure S20.** MS spectrum of (*R*)-3-hydroxy-13-methyltetradecanoic acid (**5**)

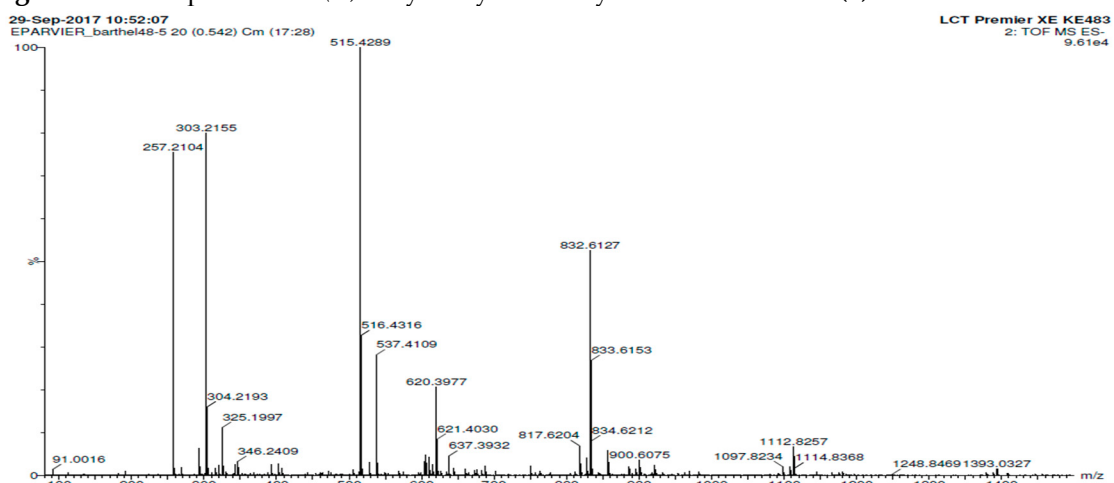

**Figure S21.**  $^1\text{H}$  NMR spectrum of 13-methyltetradecanoic acid (**6**) in  $\text{CD}_3\text{OD}$

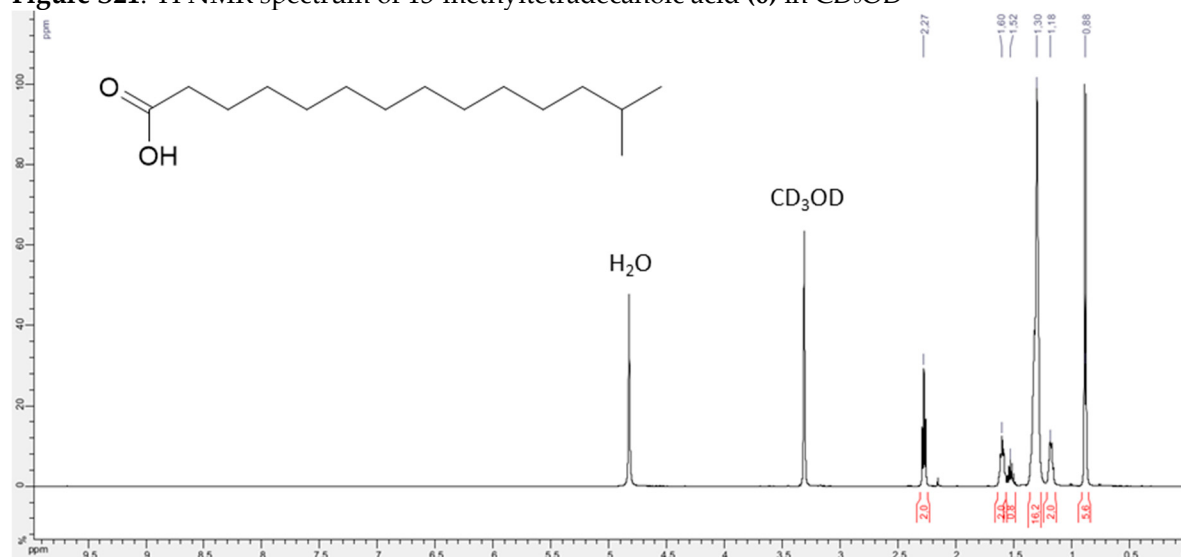

**Figure S22.**  $^{13}\text{C}$  NMR spectrum of 13-methyltetradecanoic acid (**6**) in  $\text{CD}_3\text{OD}$

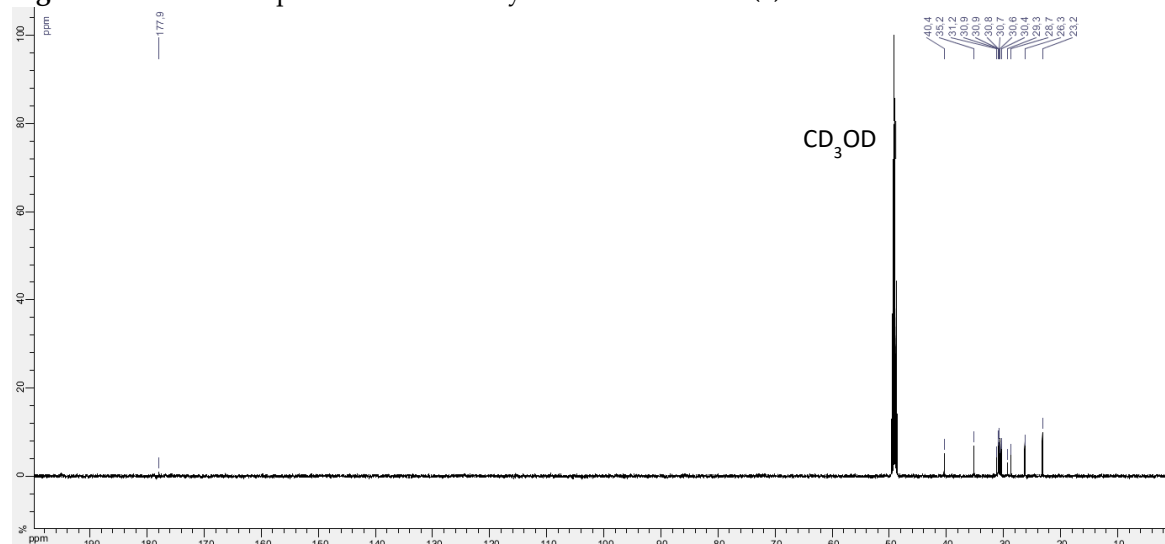

**Figure S23.** MS spectrum of 13-methyltetradecanoic acid (**6**)

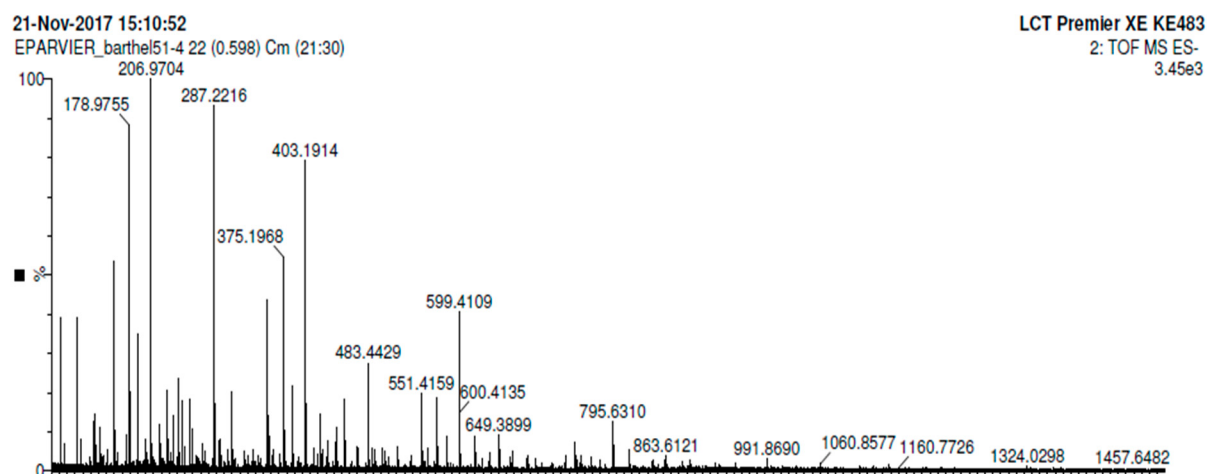

**Figure S24.**  $^1\text{H}$  NMR spectrum of 9Z-hexadecenoic acid (**7**) in  $\text{CD}_3\text{OD}$

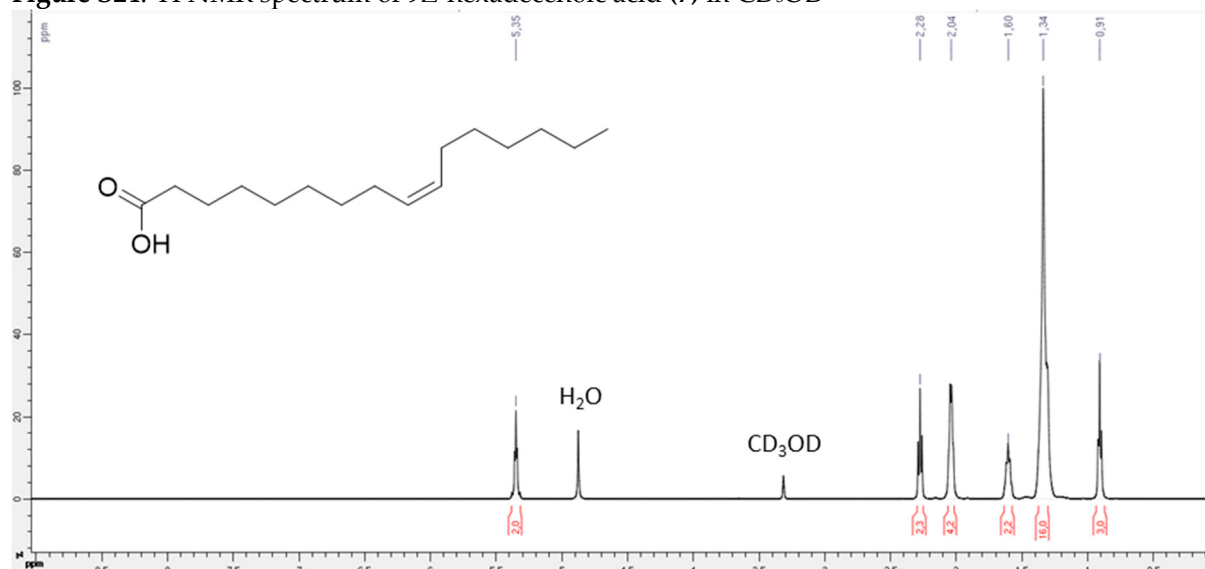

**Figure S25.**  $^{13}\text{C}$  NMR spectrum of 9Z-hexadecenoic acid (**7**) in  $\text{CD}_3\text{OD}$

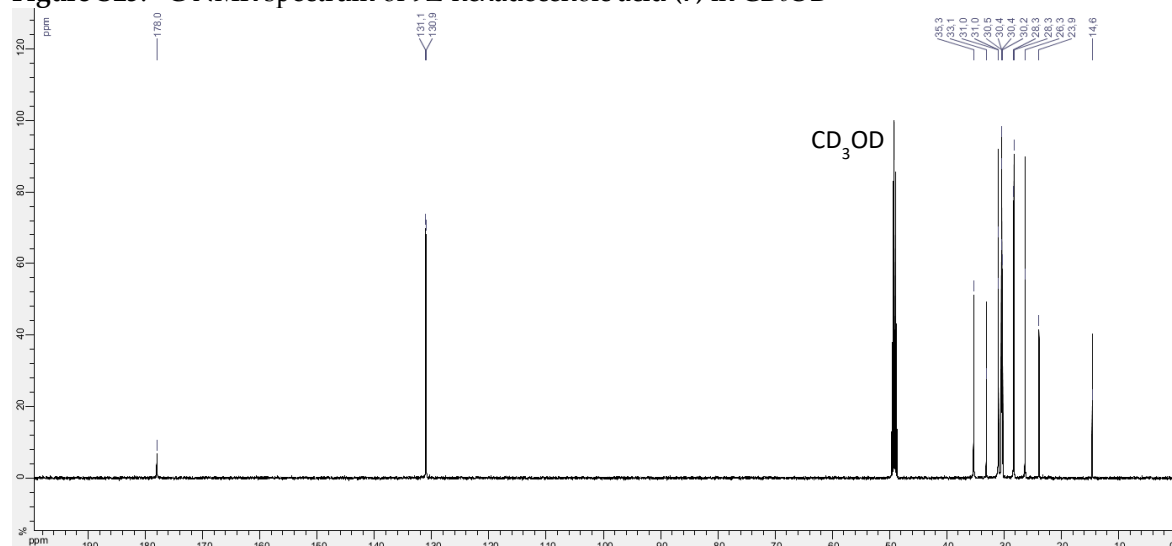

**Figure S26.** MS spectrum of 9Z-hexadecenoic acid (**7**)

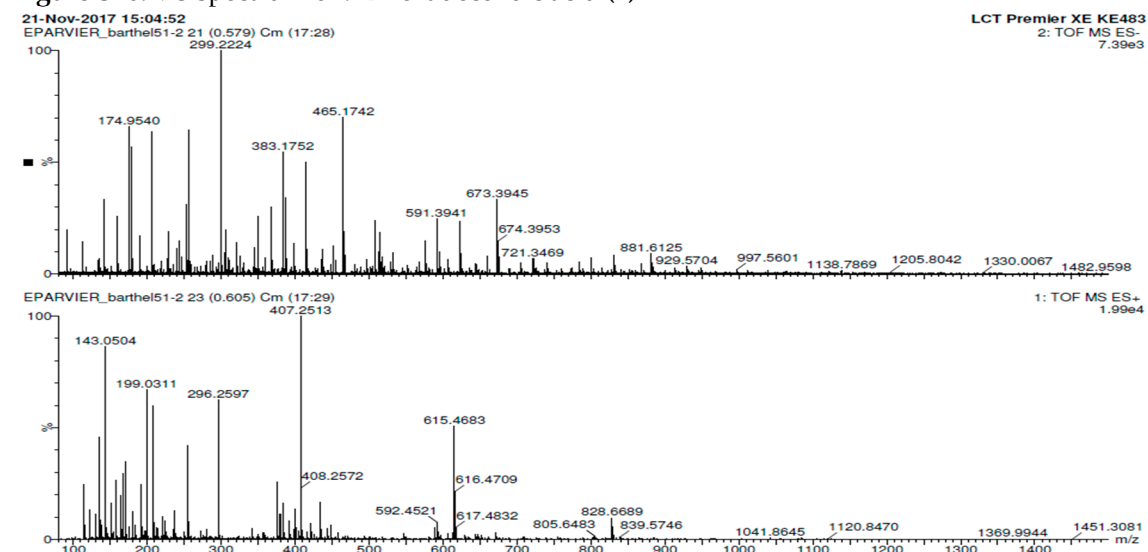

**Figure S27.**  $^1\text{H}$  NMR spectrum of 15-methyl-9Z-hexadecenoic acid (**8**) in  $\text{CD}_3\text{OD}$

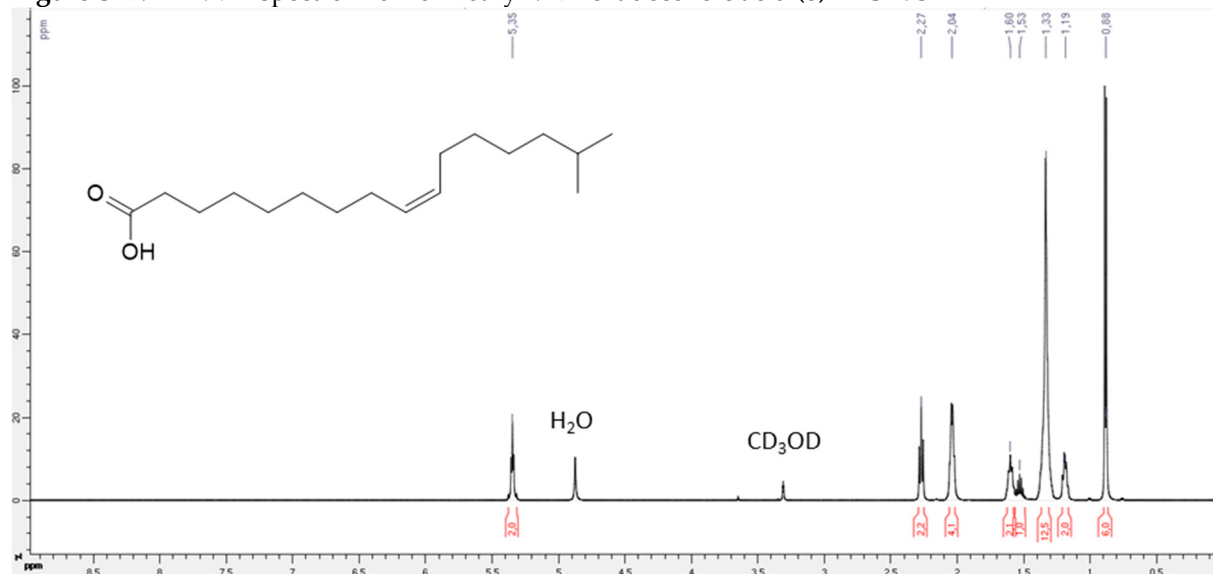

**Figure S28.**  $^{13}\text{C}$  NMR spectrum of 15-methyl-9Z-hexadecenoic acid (**8**) in  $\text{CD}_3\text{OD}$

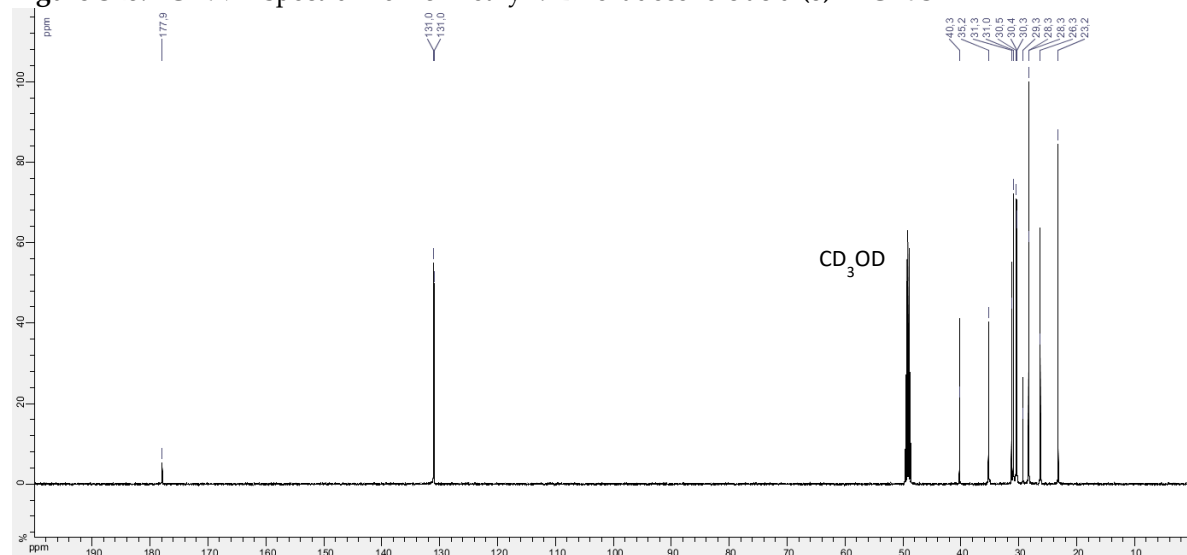

**Figure S29.** MS spectrum of 15-methyl-9Z-hexadecenoic acid (**8**)

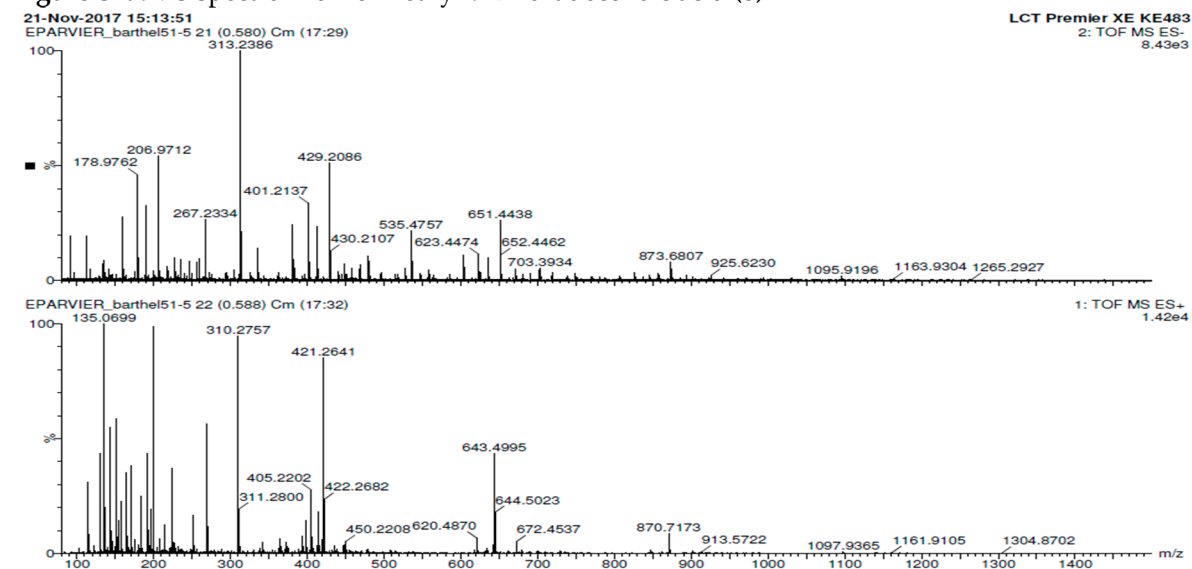

**Figure S30.** Fragmentation of 9Z-hexadecenoic acid (**7**)

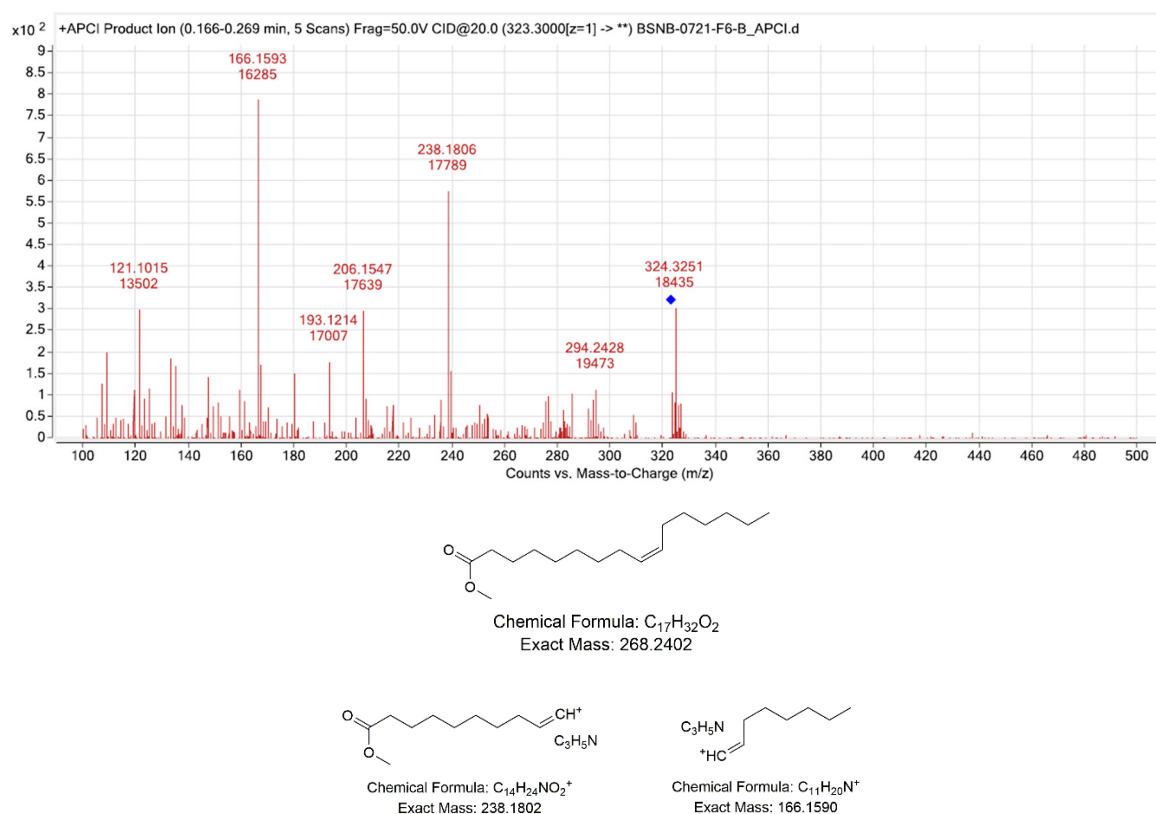

**Figure S31.** Fragmentation of 15-methyl-9Z-hexadecenoic acid (**8**)

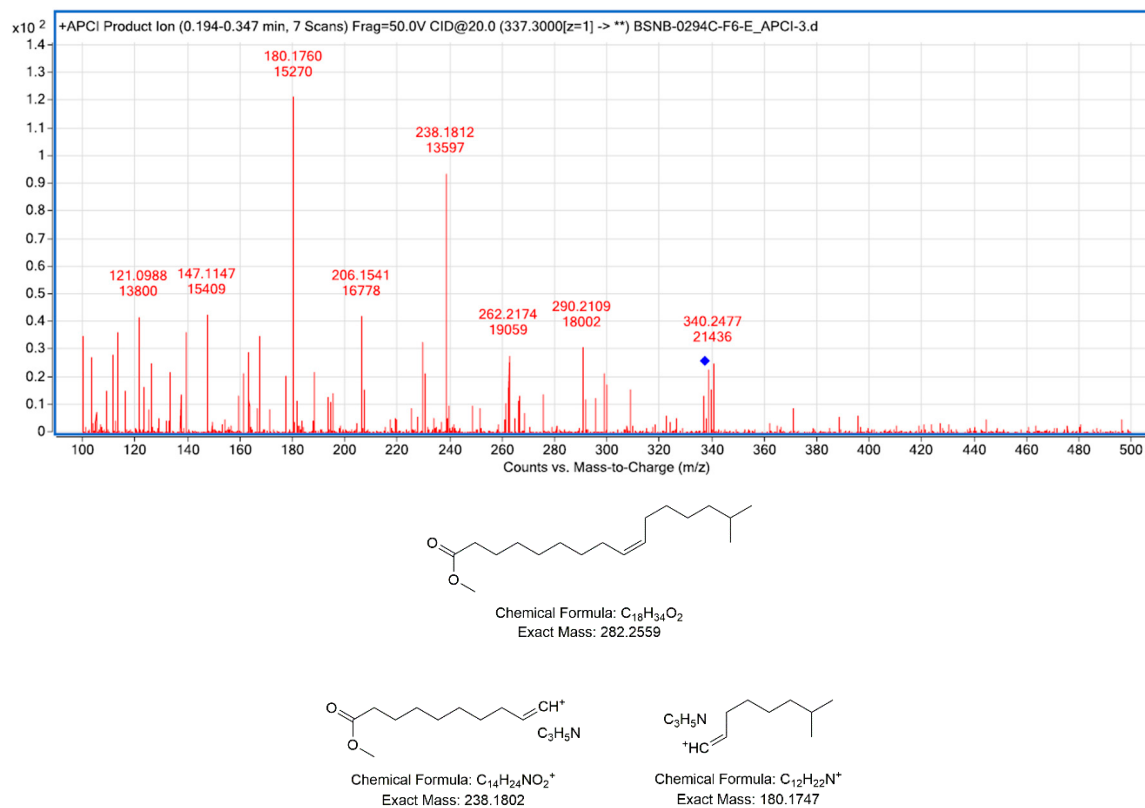

**Table S1.** Identification of endophytic microorganisms associated with *Astrocaryum sciophilum* and biological activities of their respective EtOAc extracts: antibacterial on methicillin-resistant *S. aureus* (MIC in µg/ml) and cytotoxicity on MRC-5 cells (viability percentage at the concentration of 10 µg/ml)

| ID codes  | Closest species in NCBI (accession number) | NCBI accession number | MRSA (µg/ml) | MRC-5       | Selectivity index |
|-----------|--------------------------------------------|-----------------------|--------------|-------------|-------------------|
| BSNB-0575 | <i>Fusarium</i> sp. (EF687915)             | MK279517              | 32           | 20.2 ± 1.5  | 0.63              |
| BSNB-0651 | <i>Fusarium</i> sp. (EF687946)             | MK279518              | 32           | 23.9 ± 3.0  | 0.75              |
| BSNB-0303 | <i>Fusarium decemcellular</i> (MH857667)   | MK279519              | 16           | 14.8 ± 3.7  | 0.92              |
| BSNB-0721 | <i>Luteibacter</i> sp. (JQ723723)          | MK279522              | 64           | 102.4 ± 4.5 | 1.60              |
| BSNB-0730 | <i>Bacillus subtilis</i> (CP029461)        | MK279521              | 64           | 106.5 ± 3.5 | 1.66              |
| BSNB-0732 | <i>Akanthomyces attenuatus</i> (MH872738)  | MK279520              | < 8          | 5.0 ± 0.1   | > 0.62            |

Positive Control: Vancomycin against MRSA (MIC = 1 µg/ml) and Docetaxel against MRC-5 cells (IC<sub>50</sub> = 5 × 10<sup>-10</sup> M, 0 % viability at 10 µg/ml )

**Table S2.** Antibacterial activity of AcOEt extract of *Luteibacter* sp. and its fractions on MRSA (Minimum Inhibitory Concentration in µg/mL)

| ID codes  | Fractions     | MRSA (µg/mL) |
|-----------|---------------|--------------|
| BSNB-0721 | Crude extract | 64           |
|           | F1            | > 256        |
|           | F2            | > 256        |
|           | F3            | > 256        |
|           | F4            | 128          |
|           | F5            | 256          |
|           | F6            | 32           |
|           | F7            | 256          |
|           | F8            | > 256        |

Positive control: Vancomycin (MIC = 1 µg/mL)
